# Supplementary material
Source: publisher figshare collection journal article supplement (https://gsajournals.figshare.com/articles/dataset/_/8162111)
Supplement: Supplementary file 1 [file 2]

Table S3

| Variant caller | Variant filter parameters                                                                                                                                |
|----------------|----------------------------------------------------------------------------------------------------------------------------------------------------------|
| Freebayes      | MQM>15 & MQMR>15 & QUAL>20 & DP>5 & (SAF+SAR)>2 &<br>(SRF+SAF)/(DP)>0.01 & (SRR+SAR)/(DP)>0.01                                                           |
| LoFreq         | QUAL>20 & DP>5 & (DP4[2])>2 & (DP4[3])>2 &<br>(DP4[0]+DP4[2])/(DP4[0]+DP4[1]+DP4[2]+DP4[3])>0.01 &<br>(DP4[1]+DP4[3])/(DP4[0]+DP4[1]+DP4[2]+DP4[3])>0.01 |
