# Supplementary material
Source: publisher figshare collection journal article supplement (https://gsajournals.figshare.com/articles/dataset/_/8162111)
Supplement: Supplementary file 2 [file 2]

Table S4

| Strain                         | Chromosome <sup>§</sup> and rDNA copy number changes |       |                            |       |             |       |
|--------------------------------|------------------------------------------------------|-------|----------------------------|-------|-------------|-------|
|                                | Batch culture (log)                                  |       | Batch culture (stat phase) |       | Turbidostat |       |
|                                | Chr?                                                 | rDNA? | Chr?                       | rDNA? | Chr?        | rDNA? |
| rARS <sup>GC</sup> -1a         | Chr II                                               | ↑     |                            |       | Chr IV      | ↑     |
| rARS <sup>GC</sup> -1b         | ---                                                  | ↑     |                            |       | Chr IV      | ↑     |
| rARS <sup>GC</sup> -1c         |                                                      |       |                            |       | Chr IV      | ↑     |
| rARS <sup>GC</sup> -1d         |                                                      |       |                            |       | Chr IV      | ↑     |
| rARS <sup>GC</sup> -2          |                                                      |       | Chr II                     | ↑     | Chr XII     | ↑     |
| rARS <sup>Δ</sup> -1a          | ---                                                  | Φ     |                            |       | Chr IV      | Φ     |
| rARS <sup>Δ</sup> -1b          | Chr II                                               | Φ     |                            |       | Chr XII*    | Φ     |
| rARS <sup>Δ</sup> -1c          | Chr II                                               | Φ     |                            |       |             |       |
| rARS <sup>Δ</sup> -2           |                                                      |       | CHR II/Chr XII*            | Φ     | Chr XII     | Φ     |
| rARS <sup>"wt"</sup> -2        |                                                      |       | ---                        | ↑↑↑   |             |       |
| rARS <sup>"wt"</sup> -3        |                                                      |       | ---                        | ↑↑↑   |             |       |
| rARS <sup>"wt"</sup> -12       |                                                      |       | ---                        | ↑↑↑   |             |       |
| rARS1 <sup>max</sup> -4 (ERCs) |                                                      |       | ---                        | ↑↑    |             |       |

<sup>§</sup>Disomy and partial disomy (\*)
